# Supplementary material
Source: PubMed Central journal article supplement (PMC4321727)
Supplement: NIHMS657215-supplement-Figure_legend.pdf [file NIHMS657215-supplement-Figure_legend.pdf]

**Legend to Figure 1.**

Survival according to IL-6 levels (Figure 1a), CRP levels (Figure 1b) and TNF-alpha levels (Figure 1c). Survival according to inflammation composite score (Figure 1d).
